# Supplementary material
Source: publisher figshare collection journal article supplement (https://acs.figshare.com/ndownloader/files/6036177)

# Reactivity and Selectivity in Catalytic Reactions of Enoldiazoacetamides. Assessment of Metal Carbenes as Intermediates.

Yongming Deng,<sup>†</sup> Changcheng Jing,<sup>‡</sup> Hadi Arman,<sup>†</sup> Michael P. Doyle<sup>†\*</sup>

<sup>†</sup>Department of Chemistry, The University of Texas at San Antonio, San Antonio, Texas 78249, United States

<sup>‡</sup>Shanghai Engineering Research Center of Molecular Therapeutics and New Drug Development, East China Normal University, Shanghai, 200062, P. R. China

## Supporting Information

- S1 Figure S1.** Intramolecular reaction of enoldiazoacetamide **1a** catalyzed by ZnCl<sub>2</sub> through its cyclopropene intermediate **2a** to form **3a** and **4a** monitored by <sup>1</sup>H NMR spectroscopy.
- S1 Figure S2.** Intramolecular reaction of enoldiazoacetamide **1a** catalyzed by Cu(MeCN)<sub>4</sub>PF<sub>6</sub> through its cyclopropene intermediate **2a** to form **3a** and **4a** monitored by <sup>1</sup>H NMR spectroscopy.
- S2 Figure S3.** Intramolecular reaction of enoldiazoacetamide **1a** catalyzed by [Ru(*p*-cymene)Cl<sub>2</sub>]<sub>2</sub> to form **3a** monitored by <sup>1</sup>H NMR spectroscopy.
- S2 Figure S4.** Intramolecular reaction of donor-acceptor cyclopropene **2a** catalyzed by [Co(3,5-Di<sup>t</sup>Bu-IbuPhyrin)] to form **3a** monitored by <sup>1</sup>H NMR spectroscopy.
- S3-S5 X-Ray Diffraction Analysis for Compound 6.**
- S6-S9 <sup>1</sup>H NMR and <sup>13</sup>C NMR Spectra of 4b, 3d, 4d, 6**

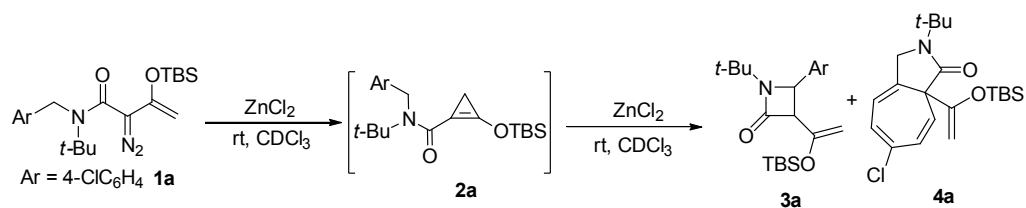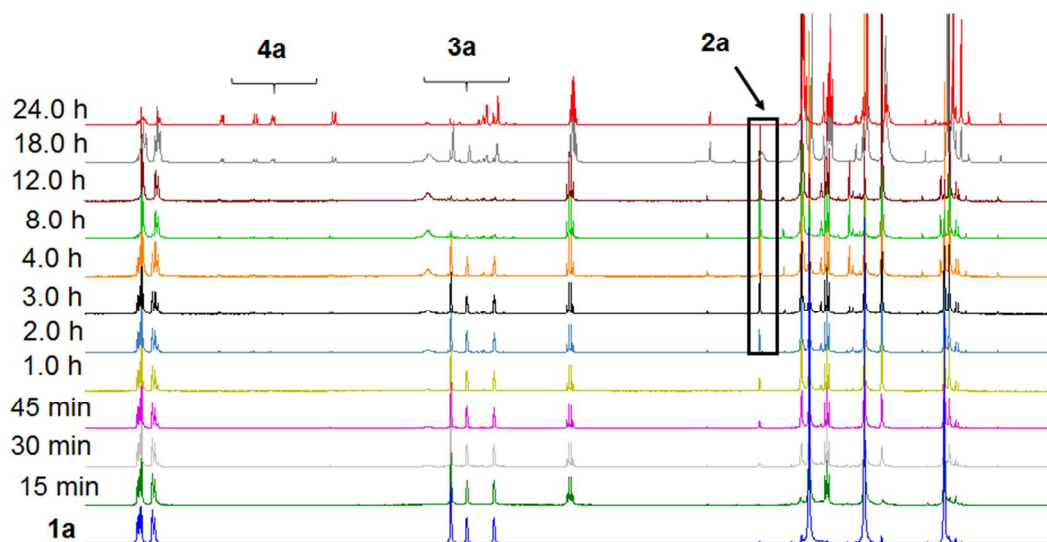

**Figure S1.** Intramolecular reaction of enoldiazoacetamide **1a** catalyzed by ZnCl<sub>2</sub> through its cyclopropene intermediate **2a** to form **3a** and **4a** monitored by <sup>1</sup>H NMR spectroscopy.

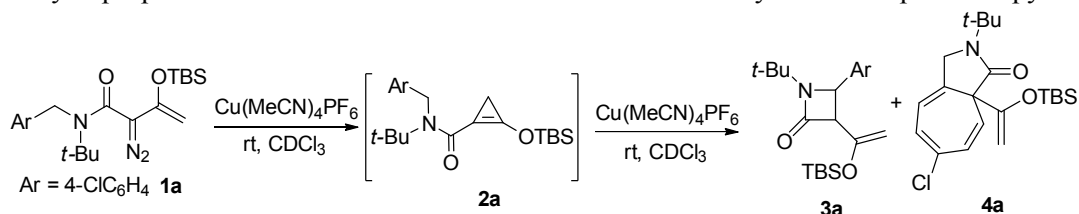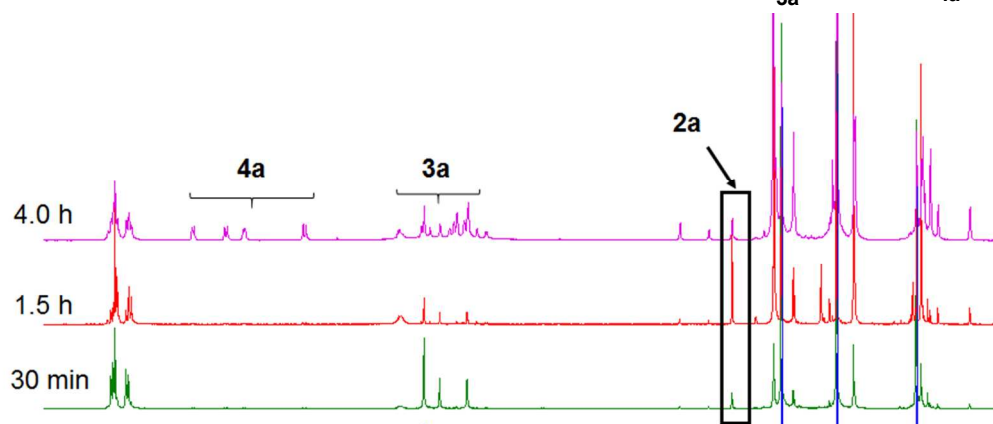

**Figure S2.** Intramolecular reaction of enoldiazoacetamide **1a** catalyzed by Cu(MeCN)<sub>4</sub>PF<sub>6</sub> through its cyclopropene intermediate **2a** to form **3a** and **4a** monitored by <sup>1</sup>H NMR spectroscopy.

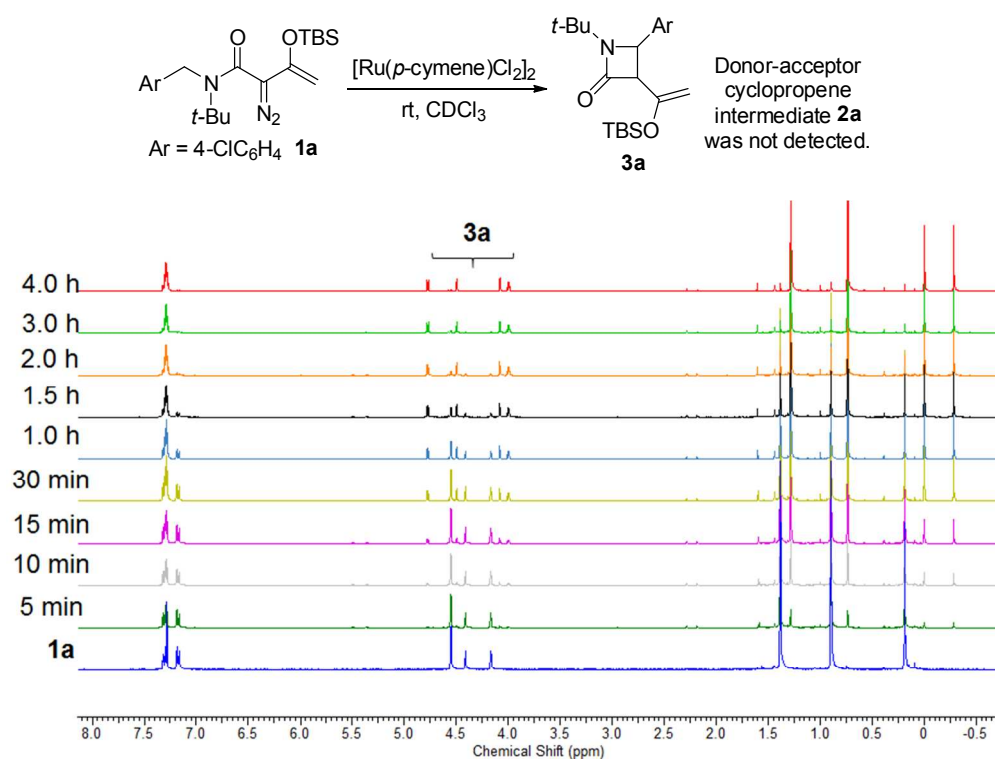

**Figure S3.** Intramolecular reaction of enoldiazoacetamide **1a** catalyzed by [Ru(*p*-cymene)Cl<sub>2</sub>]<sub>2</sub> to form **3a** monitored by <sup>1</sup>H NMR spectroscopy.

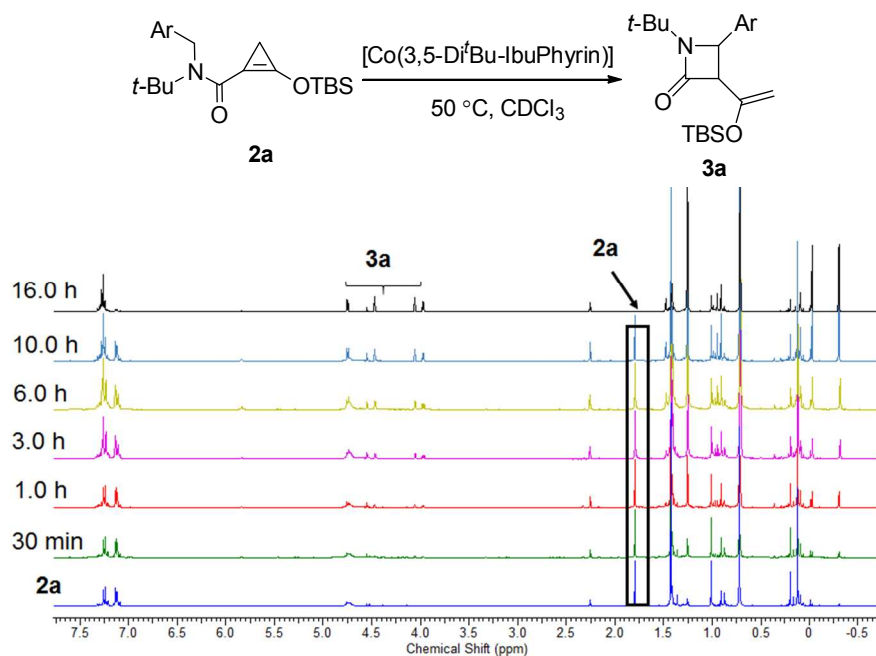

**Figure S4.** Intramolecular reaction of donor-acceptor cyclopropene **2a** catalyzed by [Co(3,5-Di<sup>*t*</sup>Bu-IbuPhyrin)] to form **3a** monitored by <sup>1</sup>H NMR spectroscopy.

## X-Ray Diffraction Analysis for Compound 6.

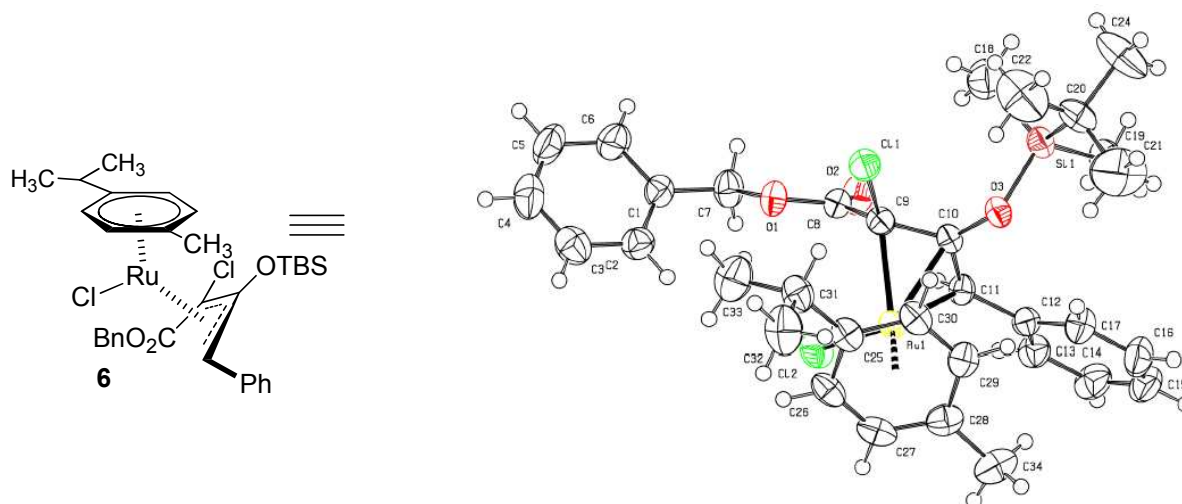

**Figure S5. ORTEP view of 6. CCDC 1498257 contains supplementary crystallographic data for 6.**

Single crystals of  $C_{33}H_{42}Cl_2O_3RuSi$  **6** were prepared by slow evaporation of DCM. A suitable yellow plank-like crystal, with dimensions of 0.36 mm  $\times$  0.26 mm  $\times$  0.07 mm, was mounted, using Paratone oil, onto a nylon loop. The data were collected at 98(2) K using a Rigaku AFC12 / Saturn 724 CCD fitted with MoK $\alpha$  radiation ( $\lambda = 0.71075$  Å). Data collection and unit cell refinement were performed using *CrystalClear* software.<sup>[1]</sup> The total number of data were measured in the range  $4.6^\circ < 2\theta < 51.0^\circ$  using  $\omega$  scans. Data processing and absorption correction, giving minimum and maximum transmission factors (0.842, 1.000), were accomplished with *CrystalClear*<sup>[1]</sup> and *ABSCOR*<sup>[2]</sup>, respectively. The structure, using Olex2<sup>[3]</sup>, was solved with the ShelXT<sup>[4]</sup> structure solution program using direct methods and refined (on  $F^2$ ) with the ShelXL<sup>[5]</sup> refinement package using full-matrix, least-squares techniques. All non-hydrogen atoms were refined with anisotropic displacement parameters. All hydrogen atom positions were determined by geometry and refined by a riding model.

<sup>[1]</sup> *CrystalClear User's Manual*, Rigaku/MSI Inc., Rigaku Corporation, the Woodlands, TX, **2011**.

<sup>[2]</sup> T. Higashi, *ABSCOR*, Rigaku Corporation, Tokyo, Japan, **1995**.

<sup>[3]</sup> O. V. Dolomanov, L. J. Bourhis, R. J. Gildea, J. A. K. Howard, H. Puschmann, *J. Appl. Cryst.* **2009**, *42*, 339.

<sup>[4]</sup> G. M. Sheldrick, *Acta Cryst.* **2015**, *A71*, 3.

<sup>[5]</sup> G. M. Sheldrick, *Acta Cryst.* **2008**, *A64*, 112.

**Table S1:** Crystallographic data and structure refinement for CCDC 1498257.

|                                     |                                                                     |
|-------------------------------------|---------------------------------------------------------------------|
| Identification code                 | CCDC 1498257                                                        |
| Empirical formula                   | C <sub>33</sub> H <sub>42</sub> Cl <sub>2</sub> O <sub>3</sub> RuSi |
| Formula weight                      | 686.72                                                              |
| Crystal system                      | Monoclinic                                                          |
| Space group                         | <i>P</i> 1 2 <sub>1</sub> /n 1                                      |
| <i>a</i> (Å)                        | 10.1410(15)                                                         |
| <i>b</i> (Å)                        | 15.406(2)                                                           |
| <i>c</i> (Å)                        | 21.056(3)                                                           |
| $\alpha$ (°)                        | 90                                                                  |
| $\beta$ (°)                         | 95.288(3)                                                           |
| $\gamma$ (°)                        | 90                                                                  |
| Volume (Å <sup>3</sup> )            | 3275.6(8)                                                           |
| <i>Z</i>                            | 4                                                                   |
| $\rho$ (calc.)                      | 1.393                                                               |
| $\lambda$                           | 0.71075                                                             |
| Temp. (K)                           | 98(2)                                                               |
| F(000)                              | 1424                                                                |
| $\mu$ (mm <sup>-1</sup> )           | 0.709                                                               |
| T <sub>min</sub> , T <sub>max</sub> | 0.842, 1.000                                                        |
| 2 $\theta$ <sub>range</sub> (°)     | 4.64 to 51.0                                                        |
| Reflections collected               | 21737                                                               |
| Independent reflections             | 6095<br>[R(int) = 0.0664]                                           |
| Completeness                        | 99.7%                                                               |
| Data / restraints / parameters      | 6095 / 0 / 369                                                      |
| Observed data                       | 5512                                                                |

|                                                  |              |
|--------------------------------------------------|--------------|
| [I > 2σ(I)]                                      |              |
| $wR(F^2 \text{ all data})$                       | 0.0973       |
| $R(F \text{ obsd data})$                         | 0.0366       |
| Goodness-of-fit on $F^2$                         | 1.05         |
| largest diff. peak and hole (e Å <sup>-3</sup> ) | 0.90 / -0.77 |

$$wR_2 = \{ \Sigma [w(F_o^2 - F_c^2)^2] / \Sigma [w(F_o^2)^2] \}^{1/2}$$

$$R_1 = \Sigma ||F_o| - |F_c|| / \Sigma |F_o|$$

2-(*tert*-Butyl)-8a-[1-(*tert*-butyldimethylsilyloxy)vinyl]-2,3-dihydrocyclohepta[*c*]pyrrol-1(8a*H*)-one (**4b**).

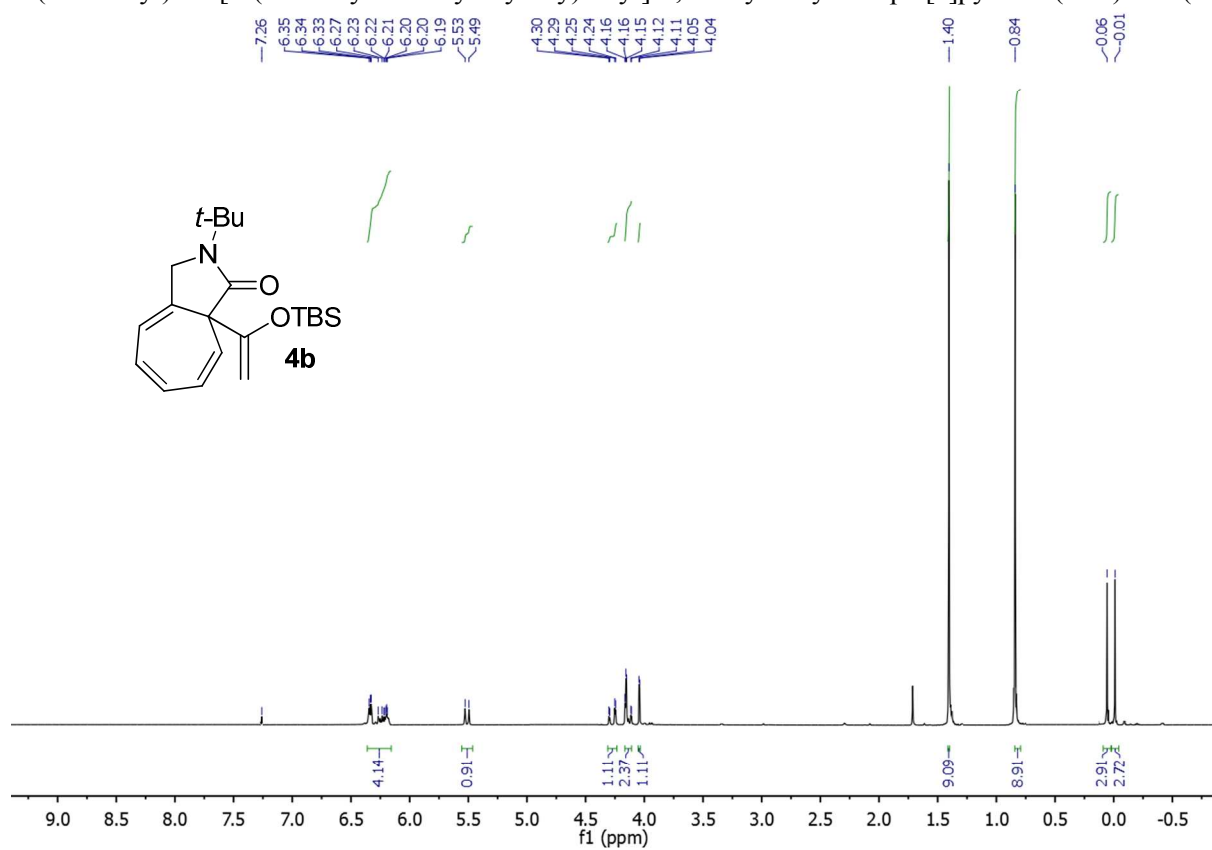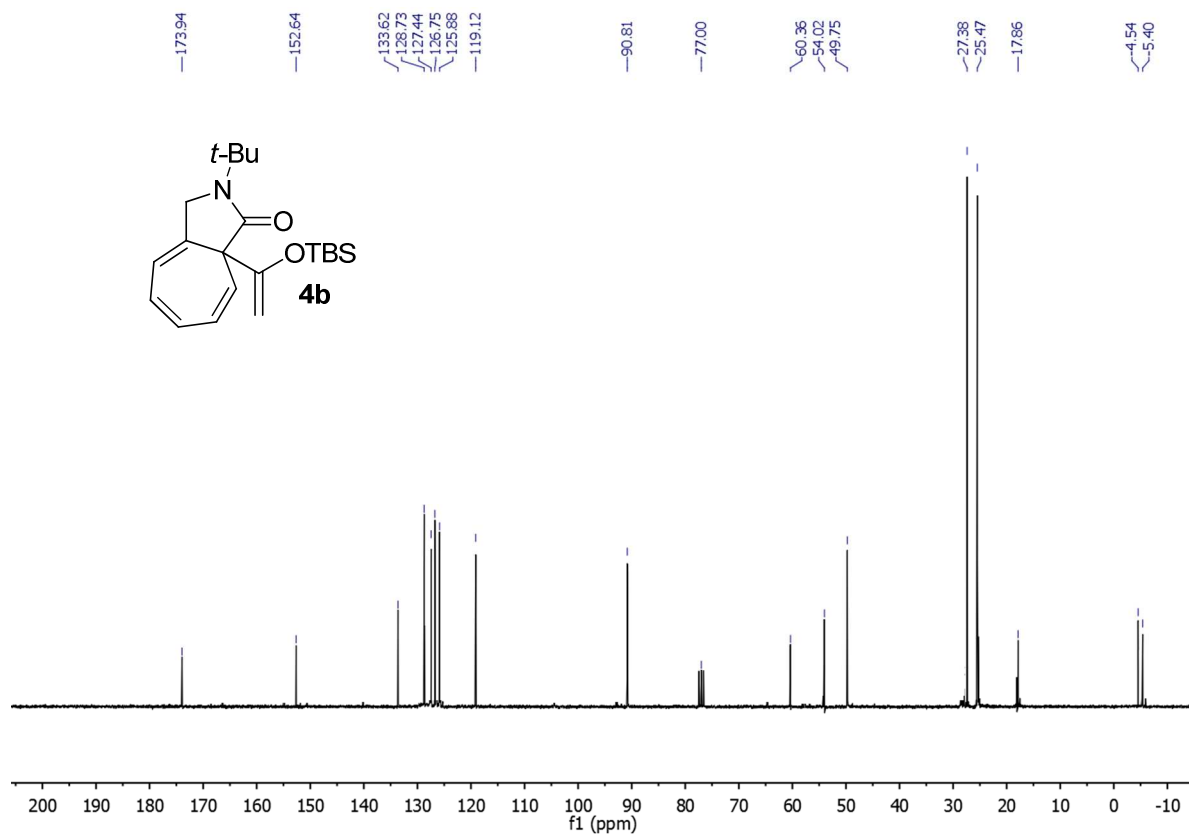

Methyl-4-1-(tert-butyl)-3-[1-(tert-butyldimethylsilyloxy)vinyl]-4-oxoazetidin-2-yl-benzoate (**3d**).

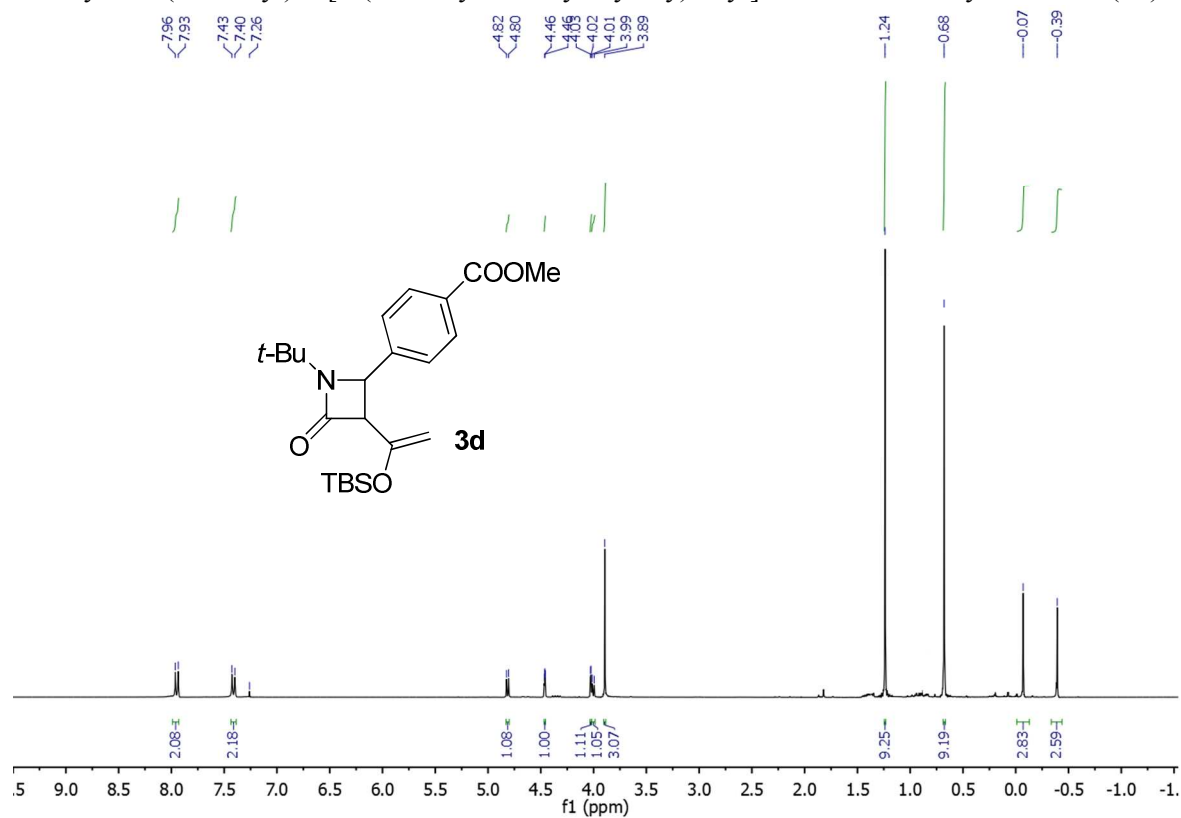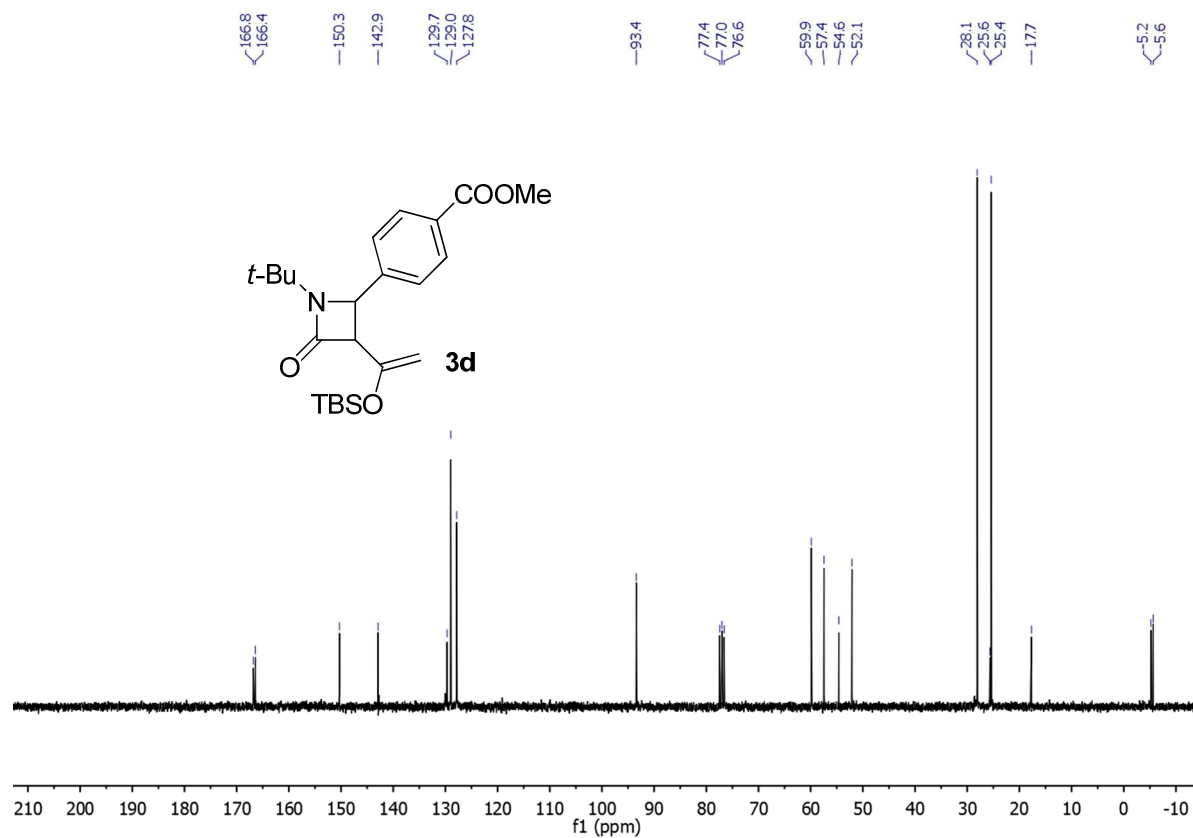



Chemical structure of **4d** is shown. The structure features a benzene ring substituted with a methoxycarbonyl group (MeOOC), a *t*-butyl group (t-Bu), and a vinyl group (CH=CH<sub>2</sub>). The structure is labeled **4d**.

<sup>1</sup>H NMR spectrum (bottom) shows peaks at 7.50, 7.46, 6.87, 6.84, 6.37, 6.34, 5.64, 5.60, 4.37, 4.37, 4.32, 4.31, 4.24, 4.18, 4.14, 4.03, 4.02, 3.80, 1.43, 0.85, 0.06, and -0.01 ppm. Integration values are provided below the peaks: 1.10, 1.07, 1.05, 1.06, 1.18, 1.19, 1.16, 1.15, 3.03, 9.42, 9.41, 2.90, 2.90.

<sup>13</sup>C NMR spectrum (top) shows peaks at 175.0, 174.6, 168.7, 168.4, 163.7, 163.4, 156.4, 156.0, 14.37, 14.37, 14.32, 14.31, 14.24, 14.18, 14.14, 14.03, 14.02, and 13.80 ppm.

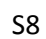

$\eta^3$ -Allyl ruthenium(II) complex **6**.

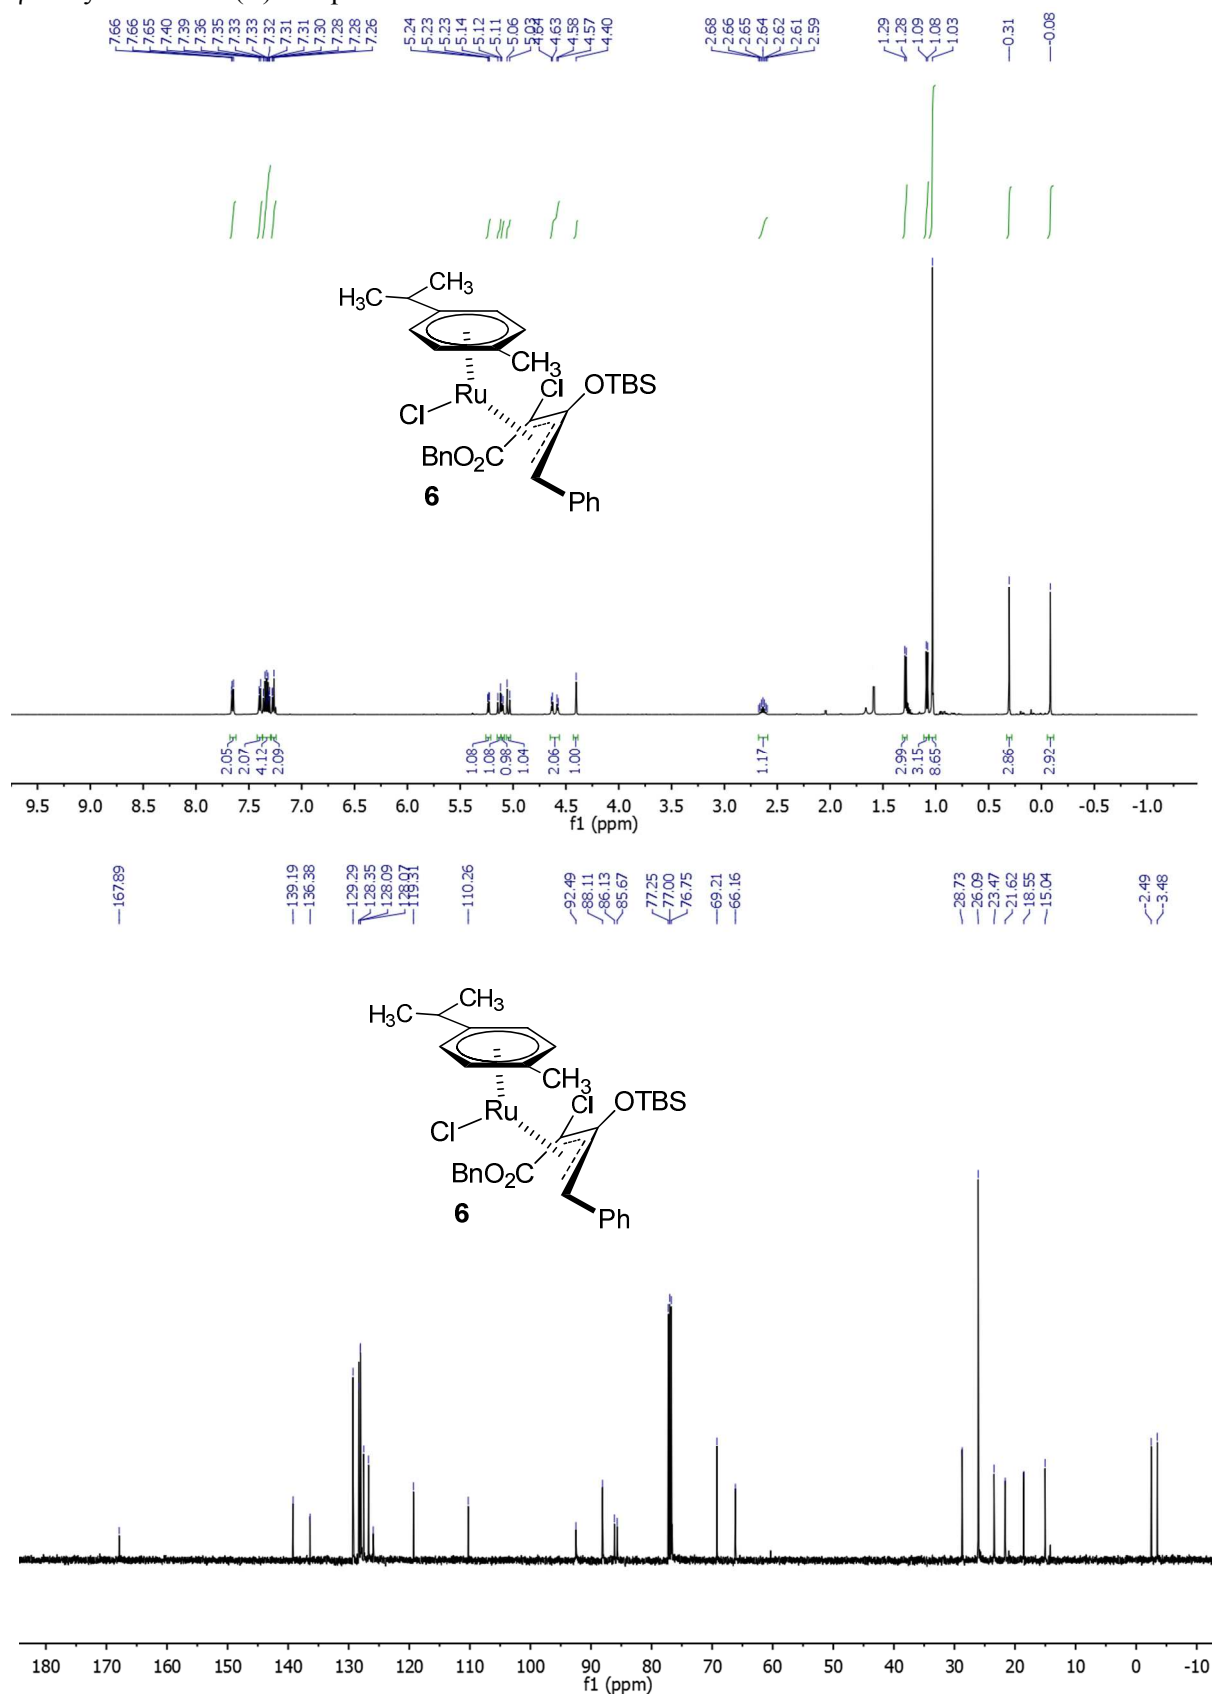

Supplement: Supplementary file 1 [file 6036177]
